1 **Assembly methods for nanopore-based metagenomic sequencing:**  
2 **a comparative study**

3

4 Adriel Latorre-Pérez<sup>1†</sup>, Pascual Villalba-Bermell<sup>1†</sup>, Javier Pascual<sup>1</sup>, Manuel Porcar<sup>1,2</sup> and Cristina  
5 Vilanova<sup>1,\*</sup>

6

7 <sup>1</sup> Darwin Bioprospecting Excellence, S.L. Paterna, Spain

8 <sup>2</sup> Institute for Integrative Systems Biology, I<sup>2</sup>SysBio (Universitat de València-CSIC). Paterna, Spain

9

10 <sup>†</sup> These authors contributed equally to this work

11 <sup>\*</sup>Corresponding author: [cristina@darwinbioprospecting.com](mailto:cristina@darwinbioprospecting.com)

12

13

14 **ABSTRACT**

15

16 **Background:** Metagenomic sequencing has lead to the recovery of previously unexplored  
17 microbial genomes. In this sense, short-reads sequencing platforms often result in highly  
18 fragmented metagenomes, thus complicating downstream analyses. Third generation sequencing  
19 technologies, such as MinION, could lead to more contiguous assemblies due to their ability to  
20 generate long reads. Nevertheless, there is a lack of studies evaluating the suitability of the available  
21 assembly tools for this new type of data.

22 **Findings:** We benchmarked the ability of different short-reads and long-reads tools to assembly two  
23 different commercially available mock communities, and observed remarkable differences in the  
24 resulting assemblies depending on the software of choice. Short-reads metagenomic assemblers  
25 proved unsuitable for MinION data. Among the long-reads assemblers tested, Flye and Canu were  
26 the only ones performing well in all the datasets. These tools were able to retrieve complete  
27 individual genomes directly from the metagenome, and assembled a bacterial genome in only two  
28 contigs in the best scenario. Despite the intrinsic high error of long-reads technologies, Canu and  
29 Flye lead to high accurate assemblies (~99.4-99.8 % of accuracy). However, errors still had an  
30 impact on the prediction of biosynthetic gene clusters.

31 **Conclusions:** MinION metagenomic sequencing data proved sufficient for assembling low-  
32 complex microbial communities, leading to the recovery of highly complete and contiguous  
33 individual genomes. This work is the first systematic evaluation of the performance of different  
34 assembly tools on MinION data, and may help other researchers willing to use this technology to  
35 choose the most appropriate software depending on their goals. Future work is still needed in order  
36 to assess the performance of Oxford Nanopore MinION data on more complex microbiomes.

## 37 INTRODUCTION

38

39 Metagenomic sequencing became a paradigm shift in the way we study and characterize microbial  
40 communities. This culture-independent technique based on shotgun sequencing has been applied in  
41 a broad range of biological fields, ranging from microbial ecology (Hiraoka *et al.*, 2016) to  
42 evolution (Hug *et al.*, 2016), or even clinical microbiology (Nutman and Marchaim, 2019). In  
43 recent years, metagenomics has also become a powerful tool for recovering individual genomes  
44 directly from complex microbiomes (Hug *et al.*, 2016; Tully *et al.*, 2018; Nayfach *et al.*, 2019),  
45 leading to the identification and description of new relevant -and mainly unculturable- taxa with  
46 meaningful implications (Fettweis *et al.*, 2019).

47

48 Illumina sequencing platforms have been the most widely used for metagenomics studies. Illumina  
49 reads are characterized by their short length (75-300 bp) and high accuracy (0.1-1 % of errors)  
50 (Goodwin *et al.*, 2016). When performing *de novo* assemblies, Illumina sequences often result in  
51 highly fragmented genomes, even if sequencing is carried out from pure cultures (Goldstein *et al.*,  
52 2019; Wick *et al.*, 2017). This is a consequence of the inability to correctly assemble genomic  
53 regions containing repetitive elements that are longer than read length (Goldstein *et al.*, 2019). The  
54 fragmentation problem is magnified when handling with metagenomic sequences due to the  
55 existence of intergenomic repeats. Intergenomic repeats are genomic regions shared by more than  
56 one taxon present in the microbial community (Olson *et al.*, 2017). It has to be noted that microbial  
57 communities often contain related species or sub-species in different -and unknown- abundances,  
58 resulting in extensive intergenomic overlaps that difficult the global assembly (Ayling *et al.*, 2019;  
59 Sczyrba *et al.*, 2017).

60

61 Third generation sequencing platforms have recently emerged as a solution to resolve ambiguous  
62 repetitive regions and to improve genome contiguity. Despite the considerable error associated to  
63 these technologies (>10 %), their ability to produce long reads (up to 10-12 kb of mean read length)  
64 (Goodwin *et al.*, 2016; Nicholls *et al.*, 2019) has allowed them to generate genomes with a high  
65 degree of completeness (Jayakumar and Sakakibara, 2017; Loman *et al.*, 2015). Currently, the most  
66 widely used third generation technologies are Pacific Biosciences (PacBio) and Oxford Nanopore  
67 Technologies (ONT), both based on single molecule sequencing, and therefore, PCR-free. PacBio  
68 was the first long-read technology to be established in the market (Koren *et al.*, 2013). However,  
69 PacBio instruments require particular operation conditions and huge capital investments (Gonzalez-  
70 Escalona *et al.*, 2019). On the other side, ONT platforms are becoming more and more popular  
71 between researchers, mainly thanks to MinION sequencers. MinION is a cost-effective (~1000\$),

72 portable sequencing platform, which enables real-time analysis pipelines (Lu *et al.*, 2016). This  
73 platform has been broadly applied over the last few years, especially for testing their suitability for  
74 in-field or clinical applications (Pomerantz *et al.*, 2018; Orsini *et al.*, 2018), but also for sequencing  
75 complete prokaryotic and eukaryotic genomes (Loman *et al.*, 2015; Wick *et al.*, 2017; Deschamps  
76 *et al.*, 2018; Jain *et al.*, 2018) and for characterizing microbial communities (Hardegen *et al.*, 2018;  
77 Benítez-Páez and Sanz, 2017).

78

79 Benchmarking is a straightforward way to evaluate genomic methodologies (i.e. DNA extraction,  
80 library preparations, etc.) and bioinformatic tools. In the metagenomic context, benchmarking  
81 studies are frequently based on mock communities. A mock community is an artificial microbial  
82 community in which the abundance of all the present microorganisms is known (Bokulich *et al.*,  
83 2016). Mock communities could be generated *in silico* (Fritz *et al.*, 2019) or experimentally, as a  
84 mixture of defined DNA proportions. For *de novo* assemblies, a great effort has been made in order  
85 to benchmark all the available tools and methodologies suitable for studying microbial ecosystems  
86 via Illumina shotgun sequencing (Sczyrba *et al.*, 2017; Vollmers *et al.*, 2017; Nurk *et al.*, 2017).  
87 Nevertheless, although there is a constant development of new softwares applicable to ONT  
88 platforms, we found that the few evaluation studies made for nanopore-based shotgun sequencing  
89 data have focused on reconstructing single bacterial genomes from isolates, but not metagenomes  
90 (Goldstein *et al.*, 2019; Tyler *et al.*, 2018; Sović *et al.*, 2016).

91

92 In the present study, we used the data generated by Nicholls *et al.* (2019) to comprehensively assess  
93 the current state-of-art of *de novo* assembly tools suitable for MinION sequencing. For that purpose,  
94 we subsampled the sequences generated by GridION and PromethION platforms to get an output  
95 comparable to the current yield of MinION sequencers. In total, we generated 8 datasets consisting  
96 of 3 and 6 Gbps of data coming from the metagenomic sequencing of two microbial communities  
97 (ZymoBIOMICS Microbial Community Standards CS and CSII) with both GridION and  
98 PromethION. Our results show very notable differences in assembly performance among the tested  
99 tools, including those designed to work with long-reads. Nevertheless, Flye and Canu were able to  
100 retrieve highly complete and contiguous draft genomes directly from the metagenome, and work  
101 consistently in all the datasets. Despite the high error associated to long-reads technologies, these  
102 assemblers were able to return draft genomes with up to 99.85 % of accuracy. Overall, this work  
103 demonstrates the suitability of using MinION sequencing alone for assembling low-complex  
104 microbial communities, and paves the way towards the standardization of bioinformatic pipelines  
105 for long-reads sequencing data.

## 106 **METHODS**

107

### 108 **Dataset description**

109 Benchmarking datasets were extracted from Nicholls *et al.* (2019), and consisted of the high  
110 coverage sequencing of two individual mock communities (ZymoBIOMICS Microbial Community  
111 Standards CS Even ZRC190633 and CSII Log ZRC190842) with both GridION and PromethION  
112 platforms. The mock communities contained the same species (eight bacteria; two yeasts), but  
113 differed in the expected proportion for each microorganism. CS mock community has an equal  
114 distribution of the microorganisms (12% for each bacteria, and 2% for the yeasts), while the  
115 microbes present on CSII are distributed on a logarithmic scale, with relative abundances ranging  
116 from 89.1% to 0.000089% (Table 1). Following the nomenclature from Nicholls *et al.* (2019), we  
117 will now onwards use the terms “Even” when referring to CS mock community, and “Log” when  
118 referring to CSII.

119

120 [Table 1]

121

122 The objective of the present study was to evaluate *de novo* assemblers suitable for MinION  
123 sequencing, which is the most widespread and accessible ONT sequencer. With the recent adoption  
124 of Guppy (Oxford Nanopore Technologies) as the lead basecaller for all the ONT sequencers, the  
125 main difference between GridION, PromethION and MinION is the final output of each platform.  
126 Nicholls *et al.* (2019) yielded ~15 Gbp of data for GridION (48h of sequencing) and ~152 Gbp for  
127 PromethION (64h of sequencing). Taking into account that GridION consists of five MinION  
128 flowcells, a single MinION standard run (48 h of sequencing) could yield, on average, an output of  
129 3 Gbp, which is a conservative estimation in comparison to other recent shotgun sequencing  
130 experiments based on MinION (Goldstein *et al.*, 2019; Dhar *et al.*, 2019; Parajuli *et al.*, 2019).  
131 However, ONT hardware and software are in constant development, leading to huge improvements  
132 in short periods of time. For that reason, GridION and PromethION datasets were subsampled to  
133 two different sequencing depths (3 Gbps and 6 Gbps) in order to recreate MinION runs with  
134 different outputs. Finally, all the selected reads were trimmed with porechop  
135 (<https://github.com/rrwick/Porechop>; v. 0.2.4) in order to remove adapters from reads ends and split  
136 sequences with internal adapters.

137

### 138 ***De novo* assemblers selection**

139 As first proposed by Lindgreen *et al.* (2016), tools selected for the present benchmarking had to  
140 meet the following criteria:

- 141
- 142 - The tool should be freely available
- 143 - The tool should have a proper manual, both for installation and usage.
- 144 - The tool should have been extensively used or show potential to become widely used

145

146 At the time of the software selection, there was not a huge variety of tools specially designed for

147 ONT data. Because of this, some of the most widespread used short-reads metagenomic assemblers

148 were also included into the benchmark. Although these assemblers are optimized for metagenomic

149 datasets, it has to be noted that they have not been designed to handle long and error-prone reads. A

150 total of six short-reads and six long-reads tools were taken into consideration. Nevertheless, it was

151 not possible to install or run all the softwares for different reasons (Table 2). It has to be noted that

152 tools were run with default parameters when no metagenomic configuration was explicitly

153 recommended in the user guide.

154

155 [Table 2]

156

157 **Reference genomes**

158 All the species included in the mock community had an available reference genome sequenced with

159 a combination of Illumina and nanopore reads (available at [https://s3.amazonaws.com/zymo-](https://s3.amazonaws.com/zymo-files/BioPool/ZymoBIOMICS.STD.refseq.v2.zip)

160 [files/BioPool/ZymoBIOMICS.STD.refseq.v2.zip](https://s3.amazonaws.com/zymo-files/BioPool/ZymoBIOMICS.STD.refseq.v2.zip)). These assemblies -provided by ZymoBIOMICS

161 company- consisted of eight complete genomes for the bacterial strains, and two draft genomes for

162 the yeasts.

163

164 Nicholls *et al.* (2019) sequenced and assembled each genome again from pure cultures using

165 Illumina reads only. However, we decided to use ZymoBIOMICS genomes as a reference for

166 carrying out the comparative analyses, due to their higher level of completeness. Although these

167 references cannot be considered as a “gold standard”, Goldstein *et al.* (2019) demonstrated that

168 nanopore sequences polished with Illumina reads had a similar error profile to MiSeq-only

169 assemblies and higher contiguity. Reference genomes were gathered in a single multi-FASTA file to

170 create a single-reference metagenome.

171

172 **Evaluation of the assembly tools**

173 All the assemblers were run in the same desktop computer (CPU: AMD RYZEN 7 1700X 3.4GHZ;

174 Cores: 8; Threads: 16; RAM: Corsair Vengeance 64 GB; SSD: Samsung 860 EVO Basic SSD

175 500GB) working under Ubuntu 18.04 operative system. Time required to perform the assembly by  
176 each tool was measured with the built-in bash version of time command.

177

178 *De novo* assemblies completeness and contiguity were first evaluated via QUAST (Gurevich *et al.*,  
179 2013; v. 5.0.2). MetaQUAST (Mikheenko *et al.*, 2015; v. 5.0.2) was used for obtaining further  
180 assembly statistics based on the alignment of the generated contigs against the reference genomes.  
181 Only contigs longer than 500 bp and with x10 coverage or more were selected for calculating the  
182 general statistics. MetaQUAST failed to run with some draft metagenomes. For that reason,  
183 minimap2 (Li *et al.*, 2018; v. ) was employed to align the assemblies to the reference metagenome.  
184 Then, ‘pileup.sh’ script from BBTools ([sourceforge.net/projects/bbmap/](https://sourceforge.net/projects/bbmap/), v. 2.15-r915) suite was  
185 utilized to calculate the percentage of metagenome covered by the draft assemblies.

186

187 The resulting assemblies were further evaluated in order to determine their error profile. Due to the  
188 lack of a standard methodology, SNPs and indels were ascertained using two different strategies.  
189 The first one consisted of the alignment of the contigs against the reference metagenome via  
190 minimap2. BAM files were then revised using bcftools (<https://samtools.github.io/bcftools/>; v. 1.9)  
191 and the in-house script ‘indels\_and\_snps.py’ (Supplementary File 1) was applied to quantify the  
192 variants. The second strategy was based on MuMmer4  
193 (<https://sourceforge.net/projects/mummer/files/>; v. 3.23). This tool was employed to align the draft  
194 assemblies to the reference metagenome. Then, the script ‘count\_SNPS\_indels.pl’ from Goldstein  
195 *et al.* (2019) was utilized to calculate the final number of SNPs and INDELS. In both strategies, the  
196 number of variants were normalized to the total assembly size of each metagenome.

197

198 Biosynthetic gene clusters (BGCs) are usually formed by repetitive genetic structures hard to  
199 assemble with short-reads technologies, and long-read technologies could thus be suitable to  
200 overcome this issue. However, BGCs are also very sensitive to frameshift errors, which have been  
201 reported to frequently occur in nanopore data (Goldstein *et al.*, 2019). For that reason, AntiSMASH  
202 web service (v. 5.0; Blin *et al.*, 2019) was used to compare the performance on BGC prediction  
203 among the different assembly tools.

## 204 **FINDINGS:**

205

### 206 Subsampling

207 In order to study the applicability of ONT to characterize low complex microbial communities, we  
208 used the data recently released by Nicholls *et al.* (2019), which consisted of the ultra-deep nanopore  
209 sequencing of two different mock communities by GridION and PromethION platforms. The mock  
210 communities were constituted by the same ten microorganisms, but in different proportions (Table  
211 1). As we wanted to study the suitability of MinION to reconstruct individual microbial genomes  
212 from metagenomes, we subsampled the GridION and PromethION datasets to have a final output of  
213 approximately 3 Gbps and 6 Gbps, which is the current output of MinION. In general, mean read  
214 length remained the same in the subsampled datasets in comparison to the original sequencing data  
215 (Nicholls *et al.*, 2019). However, read quality proved higher in the subsampled dataset, suggesting a  
216 bias towards lower qualities when the data volume increases (Table 3).

217

218 [Table 3]

219

### 220 Metagenome assembly

221 From the selected pool of available tools (Table 2), we were able to correctly install and run five out  
222 of the six long-reads assemblers, and two out of the six short-reads assemblers. In total, 58  
223 assemblies were generated, 28 for the Even mock community and 24 for the Log community. The  
224 total size of each draft assembly and the fraction of metagenome recovered from the reference  
225 genomes were evaluated for the Even datasets in order to obtain a first view of the general tool  
226 performance.

227

228 Overall, long-reads assemblers resulted in a total assembly size closer to the theoretical size, and  
229 also recovered a largest metagenome fraction, with some exceptions (Fig. 1). Nevertheless, huge  
230 differences were detected for both metrics among the assemblers. In general, all the assemblers  
231 were far from recovering the totality of the metagenome, either in the 3 Gbps or 6 Gbps datasets  
232 (Fig. 1A). It has to be noted that metaQUAST and minimap2 results were consistent for the long-  
233 reads assemblers, but not for the short-reads assemblers, where minimap2 metric was significantly  
234 higher (Fig. 1B). The Flye assembler yielded the best assembly in terms of total metagenome size  
235 and metagenome recovery -except for the minimap2 metric-, whereas Canu proved the second best  
236 assembler for both dataset sizes. Interestingly, Unicycler and Miniasm performed relatively well for  
237 the 3 Gbps dataset, but when using 6 Gb, the final assembly did not improve significantly in the  
238 case of Miniasm, and the general performance was highly reduced for Unicycler. Wtdbg2 resulted



239 in a poor assembly in comparison to the other long-reads tools for both the 3 Gbps and 6 Gbps  
240 datasets.

241

242 MetaQUAST was further employed for evaluating the degree of completeness of the individual  
243 species draft genomes (Fig. 2). As expected, yeasts were generally less recovered than bacteria, due  
244 to their lower abundance (2 %) and higher genome size. Minia and Megahit were not able to  
245 recover any single highly complete genome (>95 % of genome coverage) in any dataset, while  
246 wtdbg2 only worked well on recovering *Pseudomonas aeruginosa*'s genome. For the 3 Gbps  
247 dataset, Flye and Unicycler recovered the eight bacterial genomes with a high completeness level (>  
248 99%). Canu resulted in lower recovery percentages, but still retrieved all the prokaryotic genomes  
249 with a mean covered fraction greater than 87%. Unicycler was able to return three totally complete  
250 genomes, but did not work properly on recovering eukaryotic genomes. This was expected, since  
251 this assembler was designed for working on bacterial genomes only. For the 6 Gbps dataset,  
252 Unicycler performance decreased substantially, while Canu and Flye retrieved better or similar  
253 results. In general, Flye performed the best on both dataset sizes, especially if taking into account  
254 the proportion of yeast genomes recovered for each tool.

255

256 These results were confirmed when analyzing the Log mock community (Fig. S1). Canu, Flye and  
257 wtdbg2 were able to recover *Listeria monocytogenes* (89.1% of the total genomic DNA) and  
258 *Pseudomonas aeruginosa* (8.9%) genomes with a level of completeness higher than 99%.  
259 Nevertheless, only Canu and Flye recovered a significant fraction of *Bacillus subtilis* (0.89%).  
260 Again, Flye outperformed the rest of the tools in terms of total metagenome recovery. Unicycler  
261 failed to run with the two 3 Gbps datasets, and performed poorly with the 6 Gbps ones. These  
262 results were expected, since Unicycler was designed and optimized for working with isolated  
263 bacterial genomes. Finally, short-reads assemblers resulted in highly fragmented draft metagenomes  
264 and were not able to recover any single complete genome (Fig. S1).

265

266 Regarding the time consumed by each tool, wtdbg2 was the fastest assembler (Fig. 3A). This tool  
267 was able to assemble the 6 Gbps datasets in only 155 seconds, approximately. Miniasm was the  
268 second most rapid software, followed by Flye, which was 2.1-2.5 times faster than Unicycler, and  
269 3-5 times faster than Canu, the slowest tool. These trends were also found in the Log mock  
270 community (Fig. S2), where Canu spent up to 22 hours to reconstruct a draft metagenome assembly  
271 from the 6 Gbps datasets.

272

273 Metagenome general statistics (N50, L50, and number of contigs) were evaluated using QUAST  
274 (Fig. 3). It has to be stressed that these statistics have to be taken with care in this case, due to the  
275 huge variation in general performance among the different assemblers. For instance, wtdbg2  
276 resulted in the higher N50 and the lower L50 values for the 6 Gbps dataset, but this tool was able to  
277 cover less than the 25 % of the metagenome. In fact, the total assembly size for wtdgb2 was  
278 approximately 18 Mbps, in comparison to the 53 Mbps assembled by Flye. Altogether, it can be  
279 concluded that N50 and L50 results for wtdgb2 were indeed an artifact.

280

281 Short-reads assemblers performed poorly, resulting in thousands (Minia), or even hundreds of  
282 thousands contigs (Megahit). Interestingly, long-reads assemblers resulted in more fragmented draft  
283 genomes when using the 6 Gbps datasets, with the only exception of wtdbg2. Flye, Canu and  
284 Unicycler also reduced their N50 and increased their L50 score when using 6 Gbps. This variation  
285 was specially marked in the case of Unicycler, confirming a worse performance of this tool when  
286 using larger datasets. Goldstein *et al.* (2019) demonstrated that Canu assemblies improved with  
287 higher coverage for bacterial isolates assemblies. This fact suggests that the loss of contiguity  
288 detected in Flye and Canu may be a direct consequence of a higher recovery rate of yeast genomes,  
289 which might be more fragmented. Indeed, assembly statistics of these two assemblers remained  
290 almost the same for the bacterial species when using 3 or 6 Gbps (Tables S1 and S2). Finally, Flye  
291 resulted in a more contiguous assembly with higher N50 and lower L50 in comparison to Canu for  
292 both 3 and 6 Gbps datasets (Fig. 3). Remarkably, Flye lead to the assembly of complete bacterial  
293 genomes in a range of only 2 to 21 contigs (Fig. S3).

294

### 295 Assembly accuracy

296 Sequencing errors are the biggest throwback of third generation sequencing platforms. These errors  
297 can reach the final assemblies, resulting in lower quality draft genomes. In order to evaluate how  
298 the different assembles handle the MinION specific error profile, we ascertained the total number of  
299 SNPs and INDELs present in each draft metagenome. As described in the Methods section, we used  
300 two different -and complementary- strategies to quantify these type of errors: (1) minimap2 +  
301 bcftools, and (2) MuMMer (Fig. 4). Both strategies relied on the alignment of the draft assemblies  
302 to the reference metagenome, composed by a mix of all the complete genomes of each strain  
303 present in the mock community.

304

305 Results were not fully consistent between the two methodologies, especially for the INDELs  
306 estimation, but they still showed interesting trends. All the long-reads assemblers retrieved draft  
307 metagenomes with an average similarity higher than 98.9 %, with the exception of Miniasm, which

308 resulted in an approximate accuracy of only 96%. Canu was the most accurate assembler for both  
309 methodologies and datasets, followed by Unicycler for the 3 Gbps dataset and Flye for the 6 Gbps  
310 one. In the case of the INDELs profile, Unicycler and Canu clearly outperformed Flye. Indeed,  
311 taking into account the lack of consistency of Miniasm results, Unicycler presented the lowest  
312 INDEL ratio. This might be explained by the polishing step via Racon  
313 (<https://github.com/isovic/racon>) that Unicycler pipeline incorporates. In order to test this  
314 hypothesis, we used Racon for polishing Flye assemblies with the original nanopore raw reads. In  
315 this case, no improvements were detected in SNPs and INDELs ratio.

316

### 317 Biosynthetic gene cluster prediction

318 Gene prediction is highly affected by genome assembly and accuracy. Biosynthetic gene clusters  
319 (BCGs) are especially influenced by these factors, since they are usually found on repetitive regions  
320 which are often poorly assembled. In order to evaluate the BGC prediction on nanopore-based  
321 metagenomic assemblies, we used AntiSMASH to assess the number of clusters found on the draft  
322 assemblies retrieved by each tool in comparison to the reference metagenome (Fig. 5). For the 3  
323 Gbps GridION dataset, Unicycler predicted the maximum number of BCGs (39/46), followed by  
324 Canu and Flye (38/46). Nevertheless, Flye BGC profile differed more from the reference profile,  
325 due to an enrichment in lasso peptides. To further study this phenomenon, lasso peptides predicted  
326 by Flye were searched though BLAST against the BCGs predicted in the reference metagenome.  
327 No hits were found, suggesting that these results might be assembly artifacts. For the 6 Gbps  
328 GridION dataset, Canu performed the best, but did not increase the number of predicted clusters  
329 (38/46). As expected, Unicycler drastically decreased the number of predicted BCGs. Interestingly,  
330 Flye performed worse with higher coverage, and resulted in less BCGs (32/46).

331 **DISCUSSION:**

332

333 Assembling shotgun sequencing data is often a key factor for characterizing the functional and  
334 taxonomic diversity of microbial communities. In the recent years, MinION (Oxford Nanopore  
335 Technologies) sequencer is rapidly growing in popularity due to four basic reasons: (1) low cost, (2)  
336 long-reads generation, (3) portability, and (4) real-time analysis. Different bioinformatic tools have  
337 been developed in order to handle MinION sequences during the assembly process. Nevertheless,  
338 there is a lack of studies evaluating the performance of the current available tools for carrying out  
339 metagenomic assemblies from MinION sequences. This work aimed at filling this gap using data  
340 previously published by Nicholls *et al.* (2019), which consisted of the ultra-deep sequencing of two  
341 different mock communities (Table 1) using GridION and PromethION platforms (ONT). These  
342 sequencers follow the same sequencing principles than MinION, but they have a significantly  
343 higher output. For that reason, we decided to subsample the datasets to adequate their output to the  
344 current yield offered by MinION (3-6 Gbps) (Goldstein *et al.*, 2019; Dhar *et al.*, 2019; Parajuli *et*  
345 *al.*, 2019).

346

347 Despite the relatively low complexity of the mock communities analyzed in this evaluation study,  
348 our results showed that there is a huge variation in assembly results depending on the software  
349 chosen to perform the analysis. Minia and Megahit poorly reconstructed the microbial genomes  
350 (Fig. 1 and Fig. 2) and produced highly fragmented draft assemblies (Fig. 3). This output was  
351 expected, since these assemblers are highly optimized to work on short-reads, which are totally  
352 different from the data generated by MinION.

353

354 Long-reads assemblers (Canu, Flye, Unicycler, Miniasm and wtdgb2) also presented significant  
355 differences in the general assembly performance. Overall, only Canu and Flye performed well on all  
356 the datasets tested. They were able to recover the eight bacterial genomes from the Even dataset  
357 with a high degree of completeness, and also reconstructed a significant fraction of the yeast  
358 genomes. Strikingly, the draft bacterial genomes were highly contiguous. In fact, Flye was able to  
359 reconstruct all the prokaryotic genomes in a range of only 2-21 contigs (Fig. S3).

360

361 Although sequencing errors are one of the main throwbacks of third generation data, Canu and Flye  
362 assemblies demonstrated to be up to 99.67% (Flye) and 99.87% (Canu) accurate. Regarding  
363 INDELS, Flye was more prone to insertion/deletions than Canu. This might influence the prediction  
364 of biosynthetic gene clusters, where Canu showed a more similar functional profile in comparison  
365 to the reference metagenome. Indeed, Flye BGC profile was biased to lasso peptides. BLAST

366 analyses confirmed that these clusters did not match any other cluster predicted in the reference  
367 genome. This suggests that predicted lasso peptides might be artifact probably caused by frameshift  
368 erros due to INDELs, which explains that these type of cluster were more frequently detected in  
369 Flye's assemblies -which had a higher INDEL ratio. Finally, time is a crucial parameter when  
370 choosing a bioinformatic tool, even more if considering MinION's ability to generate real-time data.  
371 In this sense, Flye was up to 6.7 times faster than Canu, which resulted to be the slowest tool tested  
372 on this benchmarking.

373

374 Unicycler, miniasm and wtdbg2 results indicated that they are not suitable for metagenomic  
375 assembly due to different reasons. Unicycler worked well on the 3 Gbps Even dataset, but not for  
376 the rest. Indeed, this assembler was unable to run with the two 3 Gbps Log datasets, indicating a  
377 lack of consistency of the software for its application in a metagenomic context. Wtdbg2 was the  
378 fastest tool, but it was able to reconstruct only one complete genome for the Even datasets. For the  
379 Log datasets, wtdbg2 managed to recover the two most abundant bacterial genomes, being only  
380 outperformed by Canu and Flye. This fact suggested that the performance of wtdbg2 is associated  
381 with the composition of the original microbiome. Lastly, Miniasm resulted in low accuracy  
382 assemblies (~96 % of similarity to reference metagenome) (Fig. 4). This high error may explain the  
383 fact that metaQUAST failed to analyze Miniasm results. MetaQUAST is a tool mainly designed to  
384 work on second generation assemblies, and this error-prone assembly could have caused a problem  
385 when aligning the contigs against the reference. In fact, Miniasm's low accuracy could be also  
386 detected in the prediction of biosynthetic gene clusters (Fig. 5). For the 3 Gbps dataset, antiSMASH  
387 was able to predict only 7 BGCs in the Miniasm assembly, whereas 15 BGCs were predicted in  
388 wtdbg2 assembly, despite having a lower metagenome recovery fraction (~42% in Miniasm vs.  
389 ~25% in wtdbg2).

390

391 To sum up, MinION data can lead to highly contiguous and accurate assemblies when using the  
392 proper tools, with no need of complementary sequencing with Illumina. From all the tested  
393 softwares, Flye resulted the best in terms of metagenome recovery fraction, metagenome size, and  
394 contiguity. Canu was the most accurate, introduced less INDELs, and resulted in a more similar  
395 BGC profile in comparison to the reference metagenome, but its assembly process also  
396 demonstrated to be time consuming. This work might help software developers to design new  
397 bioinformatic tools optimized for MinION-based shotgun metagenomic sequencing. Further  
398 research is still needed in order to evaluate the suitability of MinION for the metagenomic analysis  
399 of more complex microbial communities.

400 **CONCLUSIONS:**

401

402 Shotgun metagenomic sequencing based on short reads usually results in highly fragmented  
403 metagenomes, which complicate downstream analyses such as the recovery of individual genomes,  
404 or the prediction of complex and repetitive gene structures (i.e. biosynthetic gene clusters, CRISPR-  
405 CAS systems, etc). This work demonstrates that, despite the high error intrinsic to third-generation  
406 sequencing platforms, MinION sequencing alone can overcome these limitations and retrieve  
407 extremely contiguous genomes directly from simple microbial communities,. However, there is a  
408 huge variation in assembly performance depending on the chosen software. In general terms, Flye is  
409 the best assembler for MinION metagenomic data. This tool leads to the highest metagenome  
410 recovery ratio and performs robustly among the tested datasets. Canu is more suitable when lower  
411 error rates are required, as in the case of BGC prediction. Our results, along with the fast  
412 improvements of Oxford Nanopore devices and dedicated softwares, suggest that this type of  
413 platforms could become the metagenomic sequencing standard in the near future.

414 **REFERENCES:**

415

416 Hiraoka, S., Yang, C. and Iwasaki, W. (2016). Metagenomics and Bioinformatics in Microbial  
417 Ecology: Current Status and Beyond. *Microbes and Environments*, 31(3), pp.204-212.

418

419 Hug, L., Baker, B., Anantharaman, K., Brown, C., Probst, A., Castelle, C., Butterfield, C.,  
420 HERNSDORF, A., AMANO, Y., ISE, K., SUZUKI, Y., DUDEK, N., RELMAN, D., FINSTAD, K., AMUNDSON, R.,  
421 THOMAS, B. and BANFIELD, J. (2016). A new view of the tree of life. *Nature Microbiology*, 1(5).

422

423 Nutman, A. and Marchaim, D. (2019). How to: molecular investigation of a hospital outbreak.  
424 *Clinical Microbiology and Infection*, 25(6), pp.688-695.

425

426 Tully, B., Graham, E. and Heidelberg, J. (2018). The reconstruction of 2,631 draft metagenome-  
427 assembled genomes from the global oceans. *Scientific Data*, 5, p.170203.

428

429 Nayfach, S., Shi, Z., Seshadri, R., Pollard, K. and Kyrpides, N. (2019). New insights from  
430 uncultivated genomes of the global human gut microbiome. *Nature*, 568(7753), pp.505-510.

431

432 Fettweis, J., Serrano, M., Brooks, J., Edwards, D., Girerd, P., Parikh, H., Huang, B., Arodz, T.,  
433 Edupuganti, L., Glascock, A., Xu, J., Jimenez, N., Vivadelli, S., Fong, S., Sheth, N., Jean, S., Lee,  
434 V., Bokhari, Y., Lara, A., Mistry, S., Duckworth, R., Bradley, S., Koparde, V., Orenda, X., Milton,  
435 S., Rozycki, S., Matveyev, A., Wright, M., Huzurbazar, S., Jackson, E., Smirnova, E., Korlach, J.,  
436 Tsai, Y., Dickinson, M., Brooks, J., Drake, J., Chaffin, D., Sexton, A., Gravett, M., Rubens, C.,  
437 Wijesooriya, N., Hendricks-Muñoz, K., Jefferson, K., Strauss, J. and Buck, G. (2019). The vaginal  
438 microbiome and preterm birth. *Nature Medicine*.

439

440 Goodwin, S., McPherson, J. and McCombie, W. (2016). Coming of age: ten years of next-  
441 generation sequencing technologies. *Nature Reviews Genetics*, 17(6), pp.333-351.

442

443 Wick, R., Judd, L., Gorrie, C. and Holt, K. (2017). Unicycler: Resolving bacterial genome  
444 assemblies from short and long sequencing reads. *PLOS Computational Biology*, 13(6),  
445 p.e1005595.

446

447 Goldstein, S., Beka, L., Graf, J. and Klassen, J. (2019). Evaluation of strategies for the assembly of  
448 diverse bacterial genomes using MinION long-read sequencing. *BMC Genomics*, 20(1).



449

450 Olson, N., Treangen, T., Hill, C., Cepeda-Espinoza, V., Ghurye, J., Koren, S. and Pop, M. (2017).  
451 Metagenomic assembly through the lens of validation: recent advances in assessing and improving  
452 the quality of genomes assembled from metagenomes. *Briefings in Bioinformatics*.

453

454 Ayling, M., Clark, M. and Leggett, R. (2019). New approaches for metagenome assembly with  
455 short reads. *Briefings in Bioinformatics*.

456

457 Sczyrba, A., Hofmann, P., Belmann, P., Koslicki, D., Janssen, S., Dröge, J., Gregor, I., Majda, S.,  
458 Fiedler, J., Dahms, E., Bremges, A., Fritz, A., Garrido-Oter, R., Jørgensen, T., Shapiro, N., Blood,  
459 P., Gurevich, A., Bai, Y., Turaev, D., DeMaere, M., Chikhi, R., Nagarajan, N., Quince, C., Meyer, F.,  
460 Balvočiūtė, M., Hansen, L., Sørensen, S., Chia, B., Denis, B., Froula, J., Wang, Z., Egan, R., Don  
461 Kang, D., Cook, J., Deltel, C., Beckstette, M., Lemaitre, C., Peterlongo, P., Rizk, G., Lavenier, D.,  
462 Wu, Y., Singer, S., Jain, C., Strous, M., Klingenberg, H., Meinicke, P., Barton, M., Lingner, T., Lin,  
463 H., Liao, Y., Silva, G., Cuevas, D., Edwards, R., Saha, S., Piro, V., Renard, B., Pop, M., Klenk, H.,  
464 Göker, M., Kyrpides, N., Woyke, T., Vorholt, J., Schulze-Lefert, P., Rubin, E., Darling, A., Rattei, T.  
465 and McHardy, A. (2017). Critical Assessment of Metagenome Interpretation—a benchmark of  
466 metagenomics software. *Nature Methods*, 14(11), pp.1063-1071.

467

468 Nicholls, S., Quick, J., Tang, S. and Loman, N. (2019). Ultra-deep, long-read nanopore sequencing  
469 of mock microbial community standards. *GigaScience*, 8(5).

470

471 Jayakumar, V. and Sakakibara, Y. (2017). Comprehensive evaluation of non-hybrid genome  
472 assembly tools for third-generation PacBio long-read sequence data. *Briefings in Bioinformatics*.

473

474 Loman, N., Quick, J. and Simpson, J. (2015). A complete bacterial genome assembled de novo  
475 using only nanopore sequencing data. *Nature Methods*, 12(8), pp.733-  
476 735. <https://doi.org/10.1093/gigascience/gix043>

477

478 Koren, S., Harhay, G., Smith, T., Bono, J., Harhay, D., Mcvey, S., Radune, D., Bergman, N. and  
479 Phillippy, A. (2013). Reducing assembly complexity of microbial genomes with single-molecule  
480 sequencing. *Genome Biology*, 14(9), p.R101.

481



- 482 Carneiro, M., Russ, C., Ross, M., Gabriel, S., Nusbaum, C. and DePristo, M. (2012). Pacific  
483 biosciences sequencing technology for genotyping and variation discovery in human data. *BMC*  
484 *Genomics*, 13(1), p.375.  
485
- 486 Gonzalez-Escalona, N., Allard, M., Brown, E., Sharma, S. and Hoffmann, M. (2019). Nanopore  
487 sequencing for fast determination of plasmids, phages, virulence markers, and antimicrobial  
488 resistance genes in Shiga toxin-producing *Escherichia coli*. *BioRxiv*.  
489
- 490 Lu, H., Giordano, F. and Ning, Z. (2016). Oxford Nanopore MinION Sequencing and Genome  
491 Assembly. *Genomics, Proteomics & Bioinformatics*, 14(5), pp.265-279.  
492
- 493 Pomerantz, A., Peñafiel, N., Arteaga, A., Bustamante, L., Pichardo, F., Coloma, L., Barrio-Amorós,  
494 C., Salazar-Valenzuela, D. and Prost, S. (2018). Real-time DNA barcoding in a rainforest using  
495 nanopore sequencing: opportunities for rapid biodiversity assessments and local capacity building.  
496 *GigaScience*, 7(4).  
497
- 498 Orsini, P., Minervini, C., Cumbo, C., Anelli, L., Zagaria, A., Minervini, A., Coccaro, N., Tota, G.,  
499 Casieri, P., Impera, L., Parciante, E., Brunetti, C., Giordano, A., Specchia, G. and Albano, F. (2018).  
500 Design and MinION testing of a nanopore targeted gene sequencing panel for chronic lymphocytic  
501 leukemia. *Scientific Reports*, 8(1).  
502
- 503 Wick, R., Judd, L., Gorrie, C. and Holt, K. (2017). Completing bacterial genome assemblies with  
504 multiplex MinION sequencing. *Microbial Genomics*, 3(10).  
505
- 506 Deschamps, S., Zhang, Y., Llaca, V., Ye, L., Sanyal, A., King, M., May, G. and Lin, H. (2018). A  
507 chromosome-scale assembly of the sorghum genome using nanopore sequencing and optical  
508 mapping. *Nature Communications*, 9(1).  
509
- 510 Jain, M., Koren, S., Miga, K., Quick, J., Rand, A., Sasani, T., Tyson, J., Beggs, A., Dilthey, A.,  
511 Fiddes, I., Malla, S., Marriott, H., Nieto, T., O'Grady, J., Olsen, H., Pedersen, B., Rhie, A.,  
512 Richardson, H., Quinlan, A., Snutch, T., Tee, L., Paten, B., Phillippy, A., Simpson, J., Loman, N.  
513 and Loose, M. (2018). Nanopore sequencing and assembly of a human genome with ultra-long  
514 reads. *Nature Biotechnology*, 36(4), pp.338-345.  
515

- 516 Hardegen, J., Latorre-Pérez, A., Vilanova, C., Günther, T., Porcar, M., Luschign, O., Simeonov, C.  
517 and Abendroth, C. (2018). Methanogenic community shifts during the transition from sewage  
518 mono-digestion to co-digestion of grass biomass. *Bioresource Technology*, 265, pp.275-281.  
519
- 520 Benítez-Páez, A. and Sanz, Y. (2017). Multi-locus and long amplicon sequencing approach to study  
521 microbial diversity at species level using the MinION™ portable nanopore sequencer. *GigaScience*,  
522 6(7).  
523
- 524 Bokulich, N., Rideout, J., Mercurio, W., Shiffer, A., Wolfe, B., Maurice, C., Dutton, R., Turnbaugh,  
525 P., Knight, R. and Caporaso, J. (2016). mockrobiota: a Public Resource for Microbiome  
526 Bioinformatics Benchmarking. *MSystems*, 1(5).  
527
- 528 Fritz, A., Hofmann, P., Majda, S., Dahms, E., Dröge, J., Fiedler, J., Lesker, T., Belmann, P.,  
529 DeMaere, M., Darling, A., Sczyrba, A., Bremges, A. and McHardy, A. (2019). CAMISIM:  
530 simulating metagenomes and microbial communities. *Microbiome*, 7(1).  
531
- 532 Sczyrba, A., Hofmann, P., Belmann, P., Koslicki, D., Janssen, S., Dröge, J., Gregor, I., Majda, S.,  
533 Fiedler, J., Dahms, E., Bremges, A., Fritz, A., Garrido-Oter, R., Jørgensen, T., Shapiro, N., Blood,  
534 P., Gurevich, A., Bai, Y., Turaev, D., DeMaere, M., Chikhi, R., Nagarajan, N., Quince, C., Meyer, F.,  
535 Balvočiūtė, M., Hansen, L., Sørensen, S., Chia, B., Denis, B., Froula, J., Wang, Z., Egan, R., Don  
536 Kang, D., Cook, J., Deltel, C., Beckstette, M., Lemaitre, C., Peterlongo, P., Rizk, G., Lavenier, D.,  
537 Wu, Y., Singer, S., Jain, C., Strous, M., Klingenberg, H., Meinicke, P., Barton, M., Lingner, T., Lin,  
538 H., Liao, Y., Silva, G., Cuevas, D., Edwards, R., Saha, S., Piro, V., Renard, B., Pop, M., Klenk, H.,  
539 Göker, M., Kyrpides, N., Woyke, T., Vorholt, J., Schulze-Lefert, P., Rubin, E., Darling, A., Rattei, T.  
540 and McHardy, A. (2017). Critical Assessment of Metagenome Interpretation—a benchmark of  
541 metagenomics software. *Nature Methods*, 14(11), pp.1063-1071.  
542
- 543 Vollmers, J., Wiegand, S. and Kaster, A. (2017). Comparing and Evaluating Metagenome Assembly  
544 Tools from a Microbiologist's Perspective - Not Only Size Matters!. *PLOS ONE*, 12(1),  
545 p.e0169662.  
546
- 547 Nurk, S., Meleshko, D., Korobeynikov, A. and Pevzner, P. (2017). metaSPAdes: a new versatile  
548 metagenomic assembler. *Genome Research*, 27(5), pp.824-834.  
549

- 550 Tyler, A., Mataseje, L., Urfano, C., Schmidt, L., Antonation, K., Mulvey, M. and Corbett, C. (2018).  
551 Evaluation of Oxford Nanopore's MinION Sequencing Device for Microbial Whole Genome  
552 Sequencing Applications. *Scientific Reports*, 8(1).  
553
- 554 Sović, I., Križanović, K., Skala, K. and Šikić, M. (2016). Evaluation of hybrid and non-hybrid  
555 methods for the novoassembly of nanopore reads. *Bioinformatics*, 32(17), pp.2582-2589.  
556
- 557 Dhar, R., Seethy, A., Pethusamy, K., Singh, S., Rohil, V., Purkayastha, K., Mukherjee, I., Goswami,  
558 S., Singh, R., Raj, A., Srivastava, T., Acharya, S., Rajashekhar, B. and Karmakar, S. (2019). De  
559 novo assembly of the Indian blue peacock (*Pavo cristatus*) genome using Oxford Nanopore  
560 technology and Illumina sequencing. *GigaScience*, 8(5).  
561
- 562 Parajuli, P., Deimel, L. and Verma, N. (2019). Genome Analysis of *Shigella flexneri* Serotype 3b  
563 Strain SFL1520 Reveals Significant Horizontal Gene Acquisitions Including a Multidrug Resistance  
564 Cassette. *Genome Biology and Evolution*, 11(3), pp.776-785.  
565
- 566 Lindgreen, S., Adair, K. and Gardner, P. (2016). An evaluation of the accuracy and speed of  
567 metagenome analysis tools. *Scientific Reports*, 6(1).  
568
- 569 Gurevich, A., Saveliev, V., Vyahhi, N. and Tesler, G. (2013). QUAST: quality assessment tool for  
570 genome assemblies. *Bioinformatics*, 29(8), pp.1072-1075.  
571
- 572 Nicholls, S., Quick, J., Tang, S. and Loman, N. (2018). Ultra-deep, long-read nanopore sequencing  
573 of mock microbial community standards.  
574
- 575 Mikheenko, A., Saveliev, V. and Gurevich, A. (2015). MetaQUAST: evaluation of metagenome  
576 assemblies. *Bioinformatics*, 32(7), pp.1088-1090.  
577
- 578 Li, H. (2018). Minimap2: pairwise alignment for nucleotide sequences. *Bioinformatics*, 34(18),  
579 pp.3094-3100.  
580
- 581 Blin, K., Shaw, S., Steinke, K., Villebro, R., Ziemert, N., Lee, S., Medema, M. and Weber, T.  
582 (2019). antiSMASH 5.0: updates to the secondary metabolite genome mining pipeline. *Nucleic  
583 Acids Research*, 47(W1), pp.W81-W87.

584 **FIGURE LEGENDS**

585

586 **Figure 1.** Evaluation of metagenome assembly size corresponding to each tested tool for the Even  
587 datasets. (A) Total assembled size of draft assemblies with respect to the total size of the reference  
588 metagenome; (B) Fraction of the reference metagenome covered by the draft assembly, calculated  
589 by two different methods: metaQUAST (up) and minimap2 + BBTools (down).

590

591 **Figure 2.** Fraction of genome covered by draft assemblies obtained with each tool, and for each  
592 individual microorganism (Even datasets). Minimap2 + miniasm assemblies are not shown, since it  
593 was not possible to evaluate them with metaQUAST.

594

595 **Figure 3.** General assembly performance of each tool for the Even datasets. (A) Run time; (B) N50;  
596 (C) Number of contigs; (D) L50.

597

598 **Figure 4.** Assembly accuracy for the draft assemblies in the Even datasets. (A) Percentage of  
599 similarity calculated as the total number of matches normalized by the metagenome size; (B)  
600 Percentage of INDELs calculated as the total number of INDELs normalized by the metagenome  
601 size. In both cases, two different strategies were used: (1) alignment with minimap and evaluation  
602 with bcftools + 'indels\_and\_snps.py' in-house script; (2) alignment with MuMMer and evaluation  
603 with 'count\_SNPS\_indels.pl' script from Goldstein *et al.* (2019).

604

605 **Figure 5.** Number of biosynthetic gene clusters (BGCs) predicted by antiSMASH for each draft  
606 assembly in the Even GridION datasets. (A) BGCs predicted for the 3 Gbps dataset; (B) BGCs  
607 predicted for the 6 Gbps dataset.

608

609 **Figure S1.** Fraction of genome covered by draft assemblies obtained with each tool, and for each  
610 individual microorganism (Log datasets). Minimap2 + miniasm assemblies are not shown, since it  
611 was not possible to evaluate them with metaQUAST.

612

613 **Figure S2.** General assembly performance of each tool for the Log datasets. (A) Run time; (B) N50;  
614 (C) Number of contigs; (D) L50.

615

616 **Figure S3.** Number of contigs for each bacterial genome retrieved by Flye for the Even datasets.

617 **TABLE LEGENDS**

618

619 **Table 1.** Description of the microorganisms comprising the ZymoBIOMICS mock communities and  
620 their theoretical composition.

621

622 **Table 2.** List of assemblers selected for the present benchmarking study.

623

624 **Table 3.** Description of the original and the subsampled datasets.

625

626 **Table S1.** Canu's basic assembly statistics for the GridION datasets.

627

628 **Table S2.** Flye's basic assembly statistics for the GridION datasets.

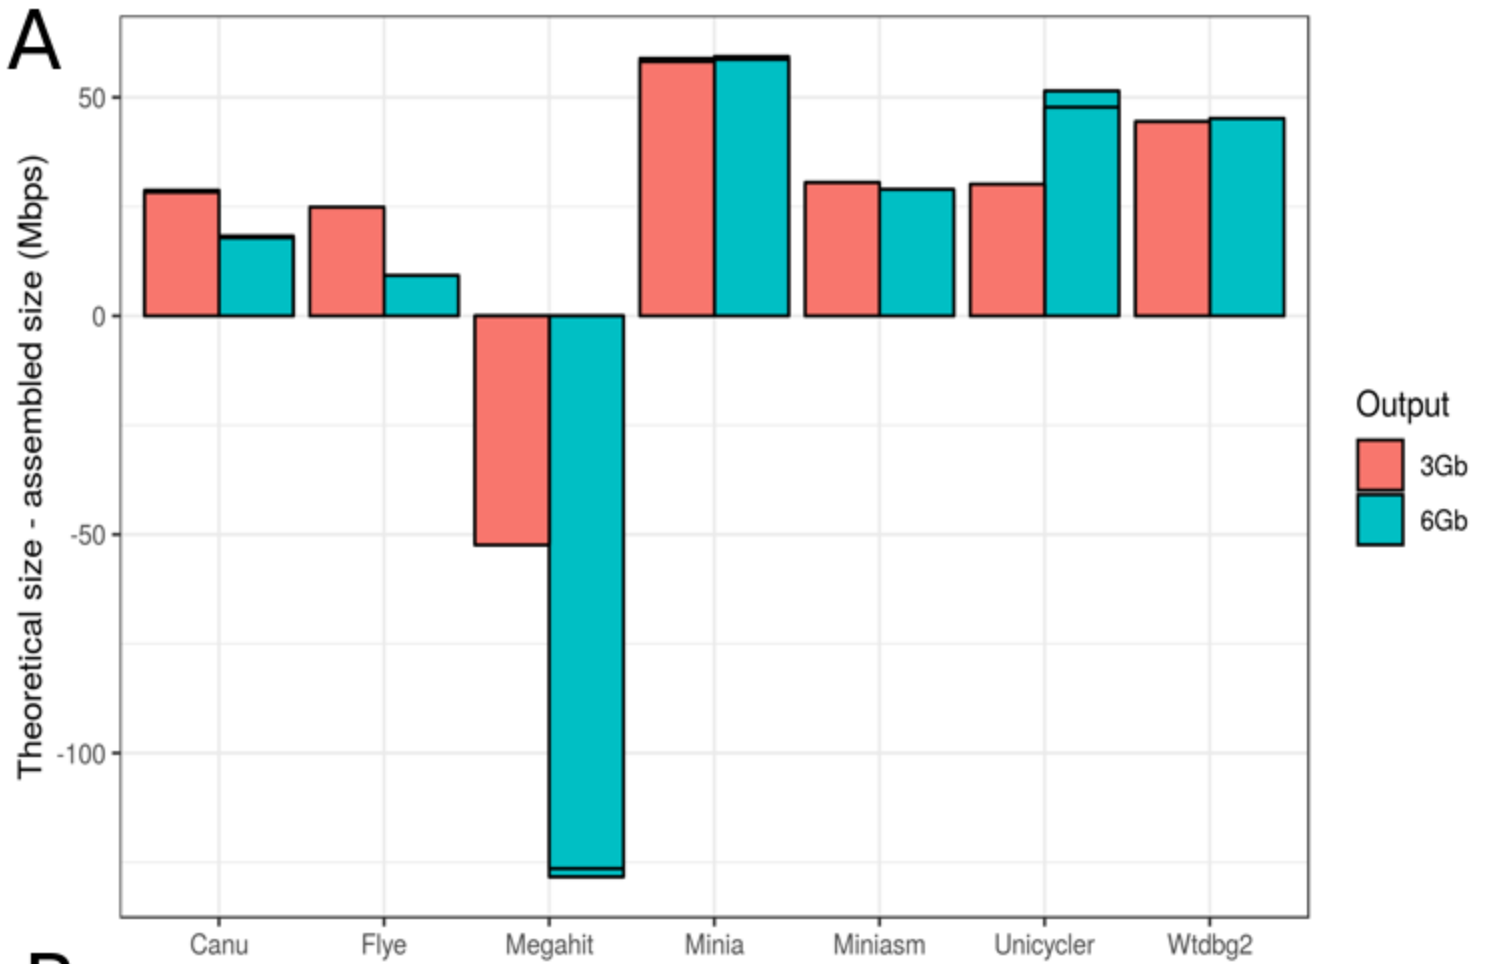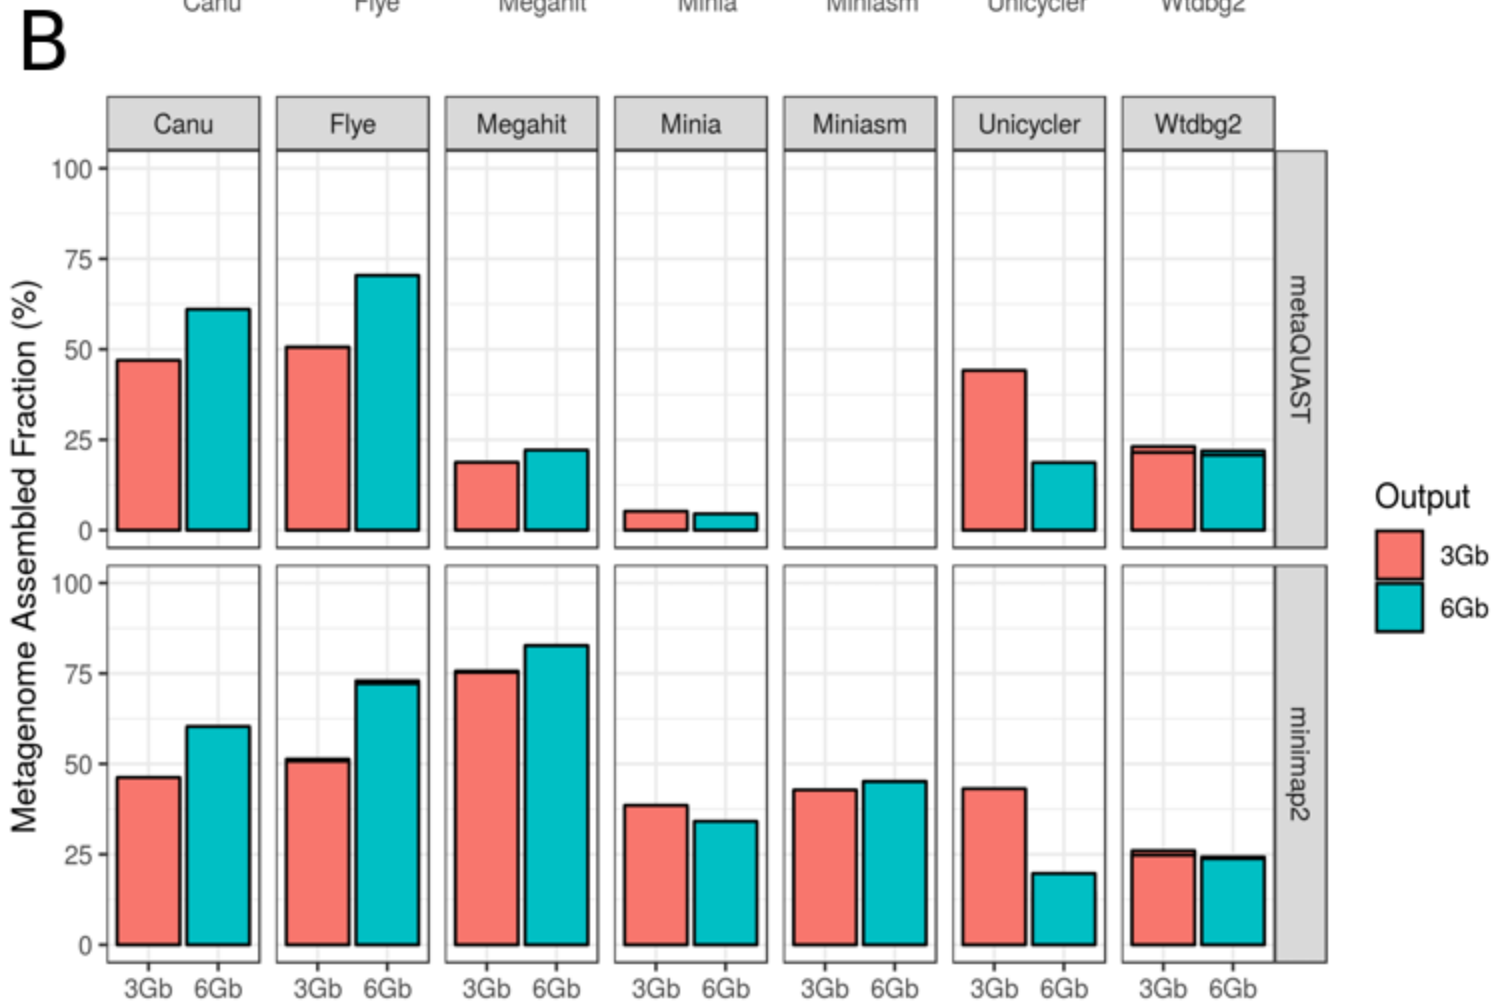

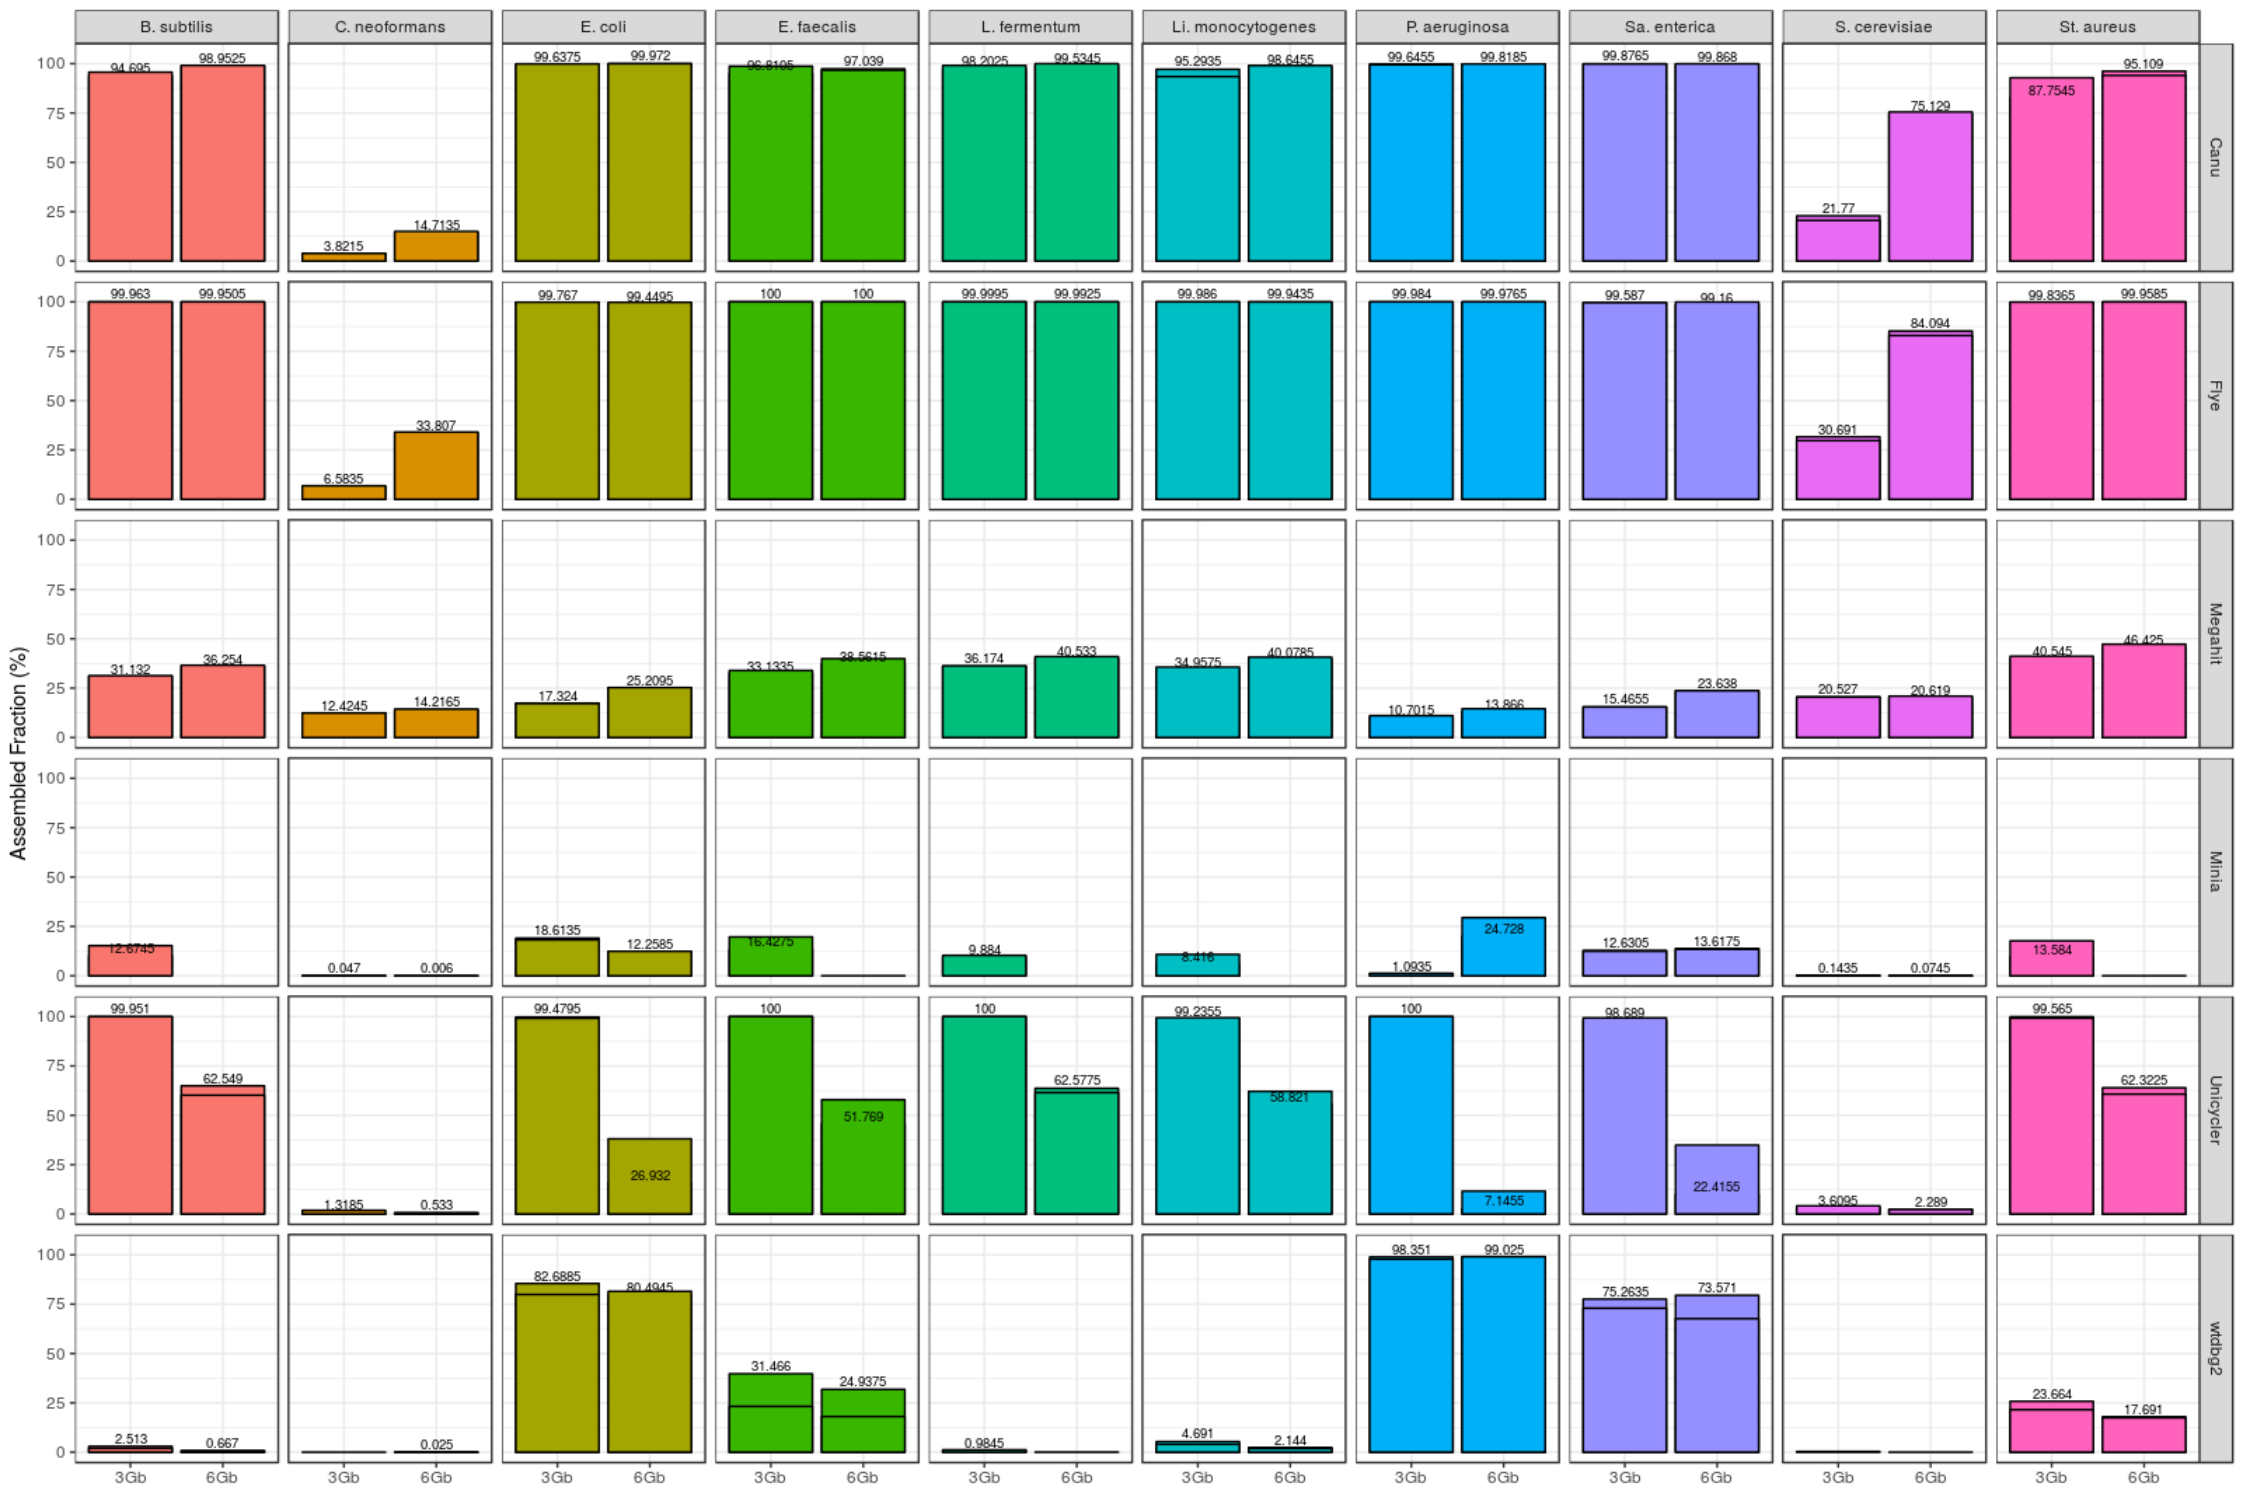

Output ● 3Gb ● 6Gb

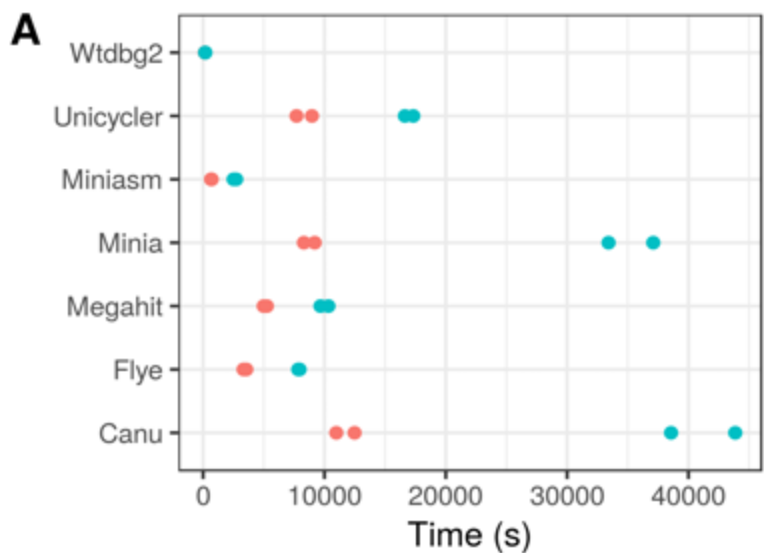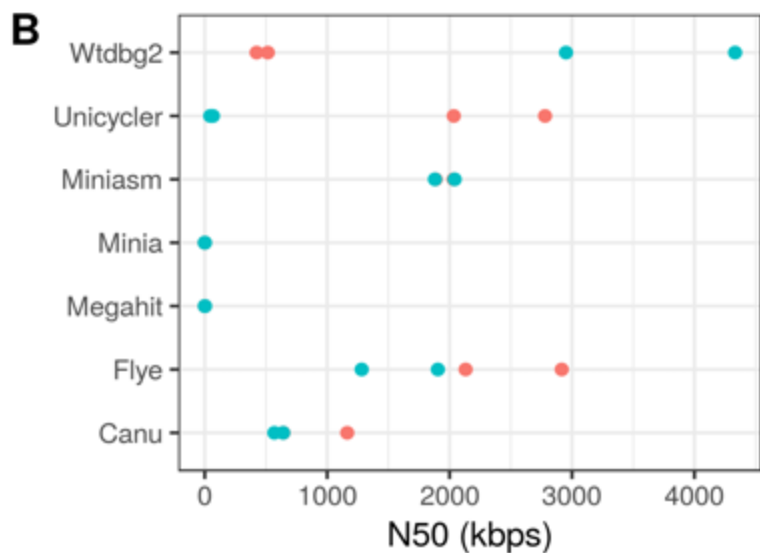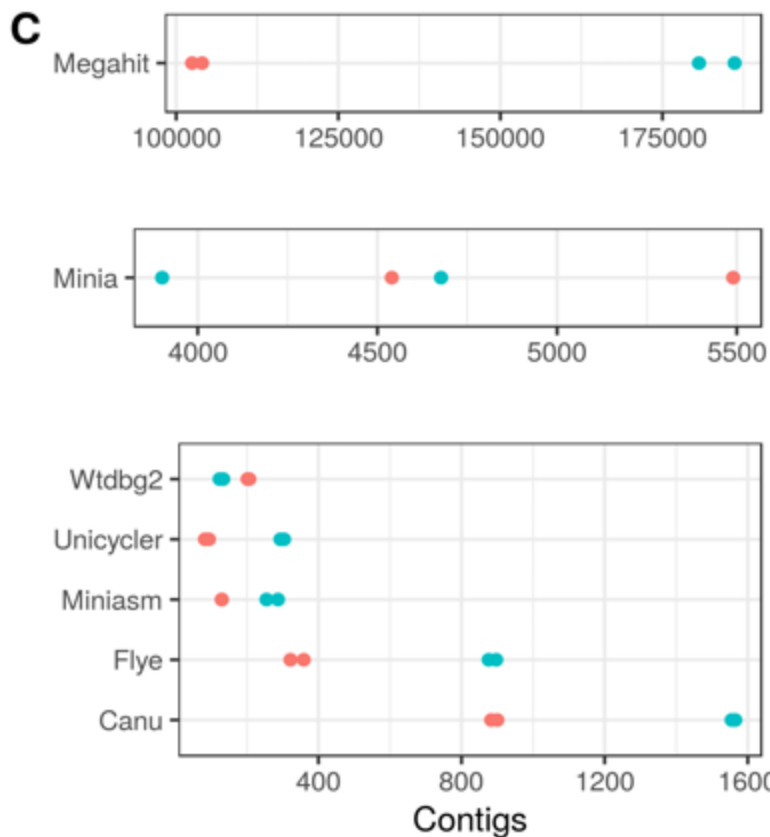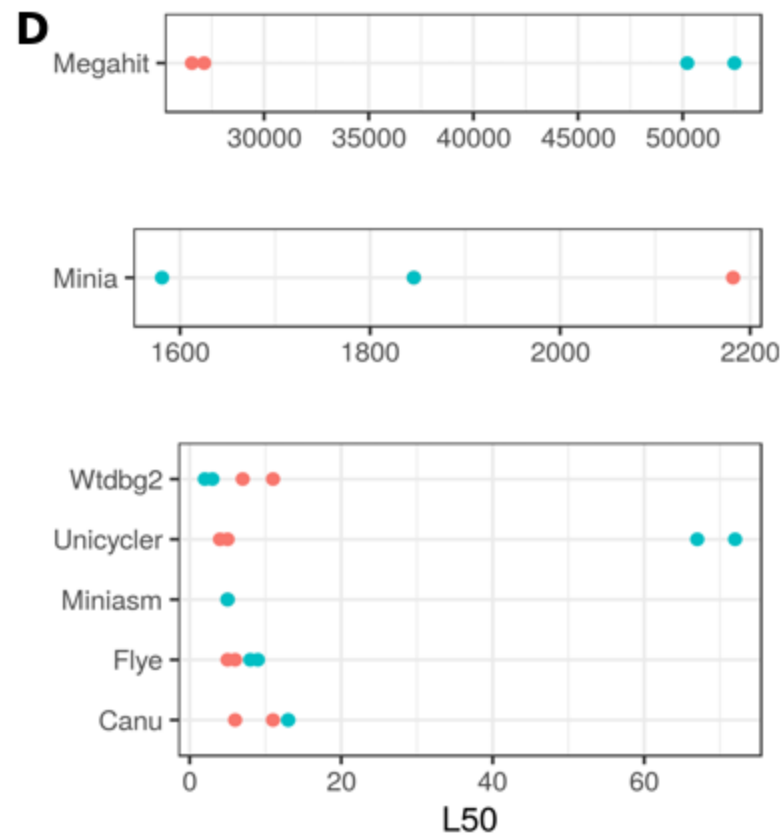



**A**

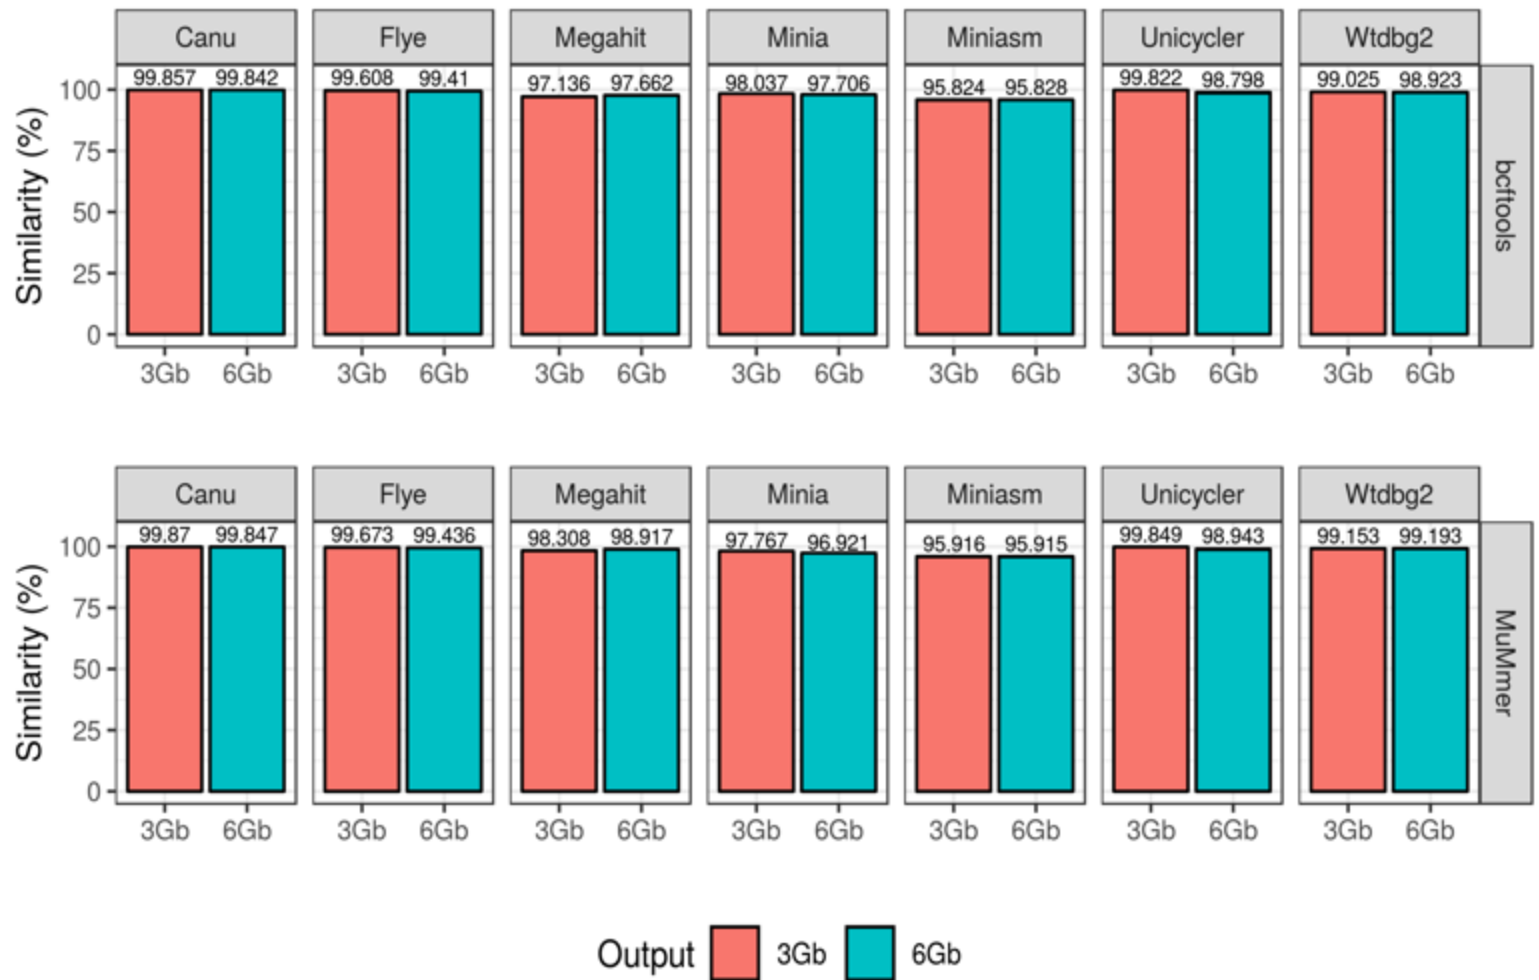

**B**

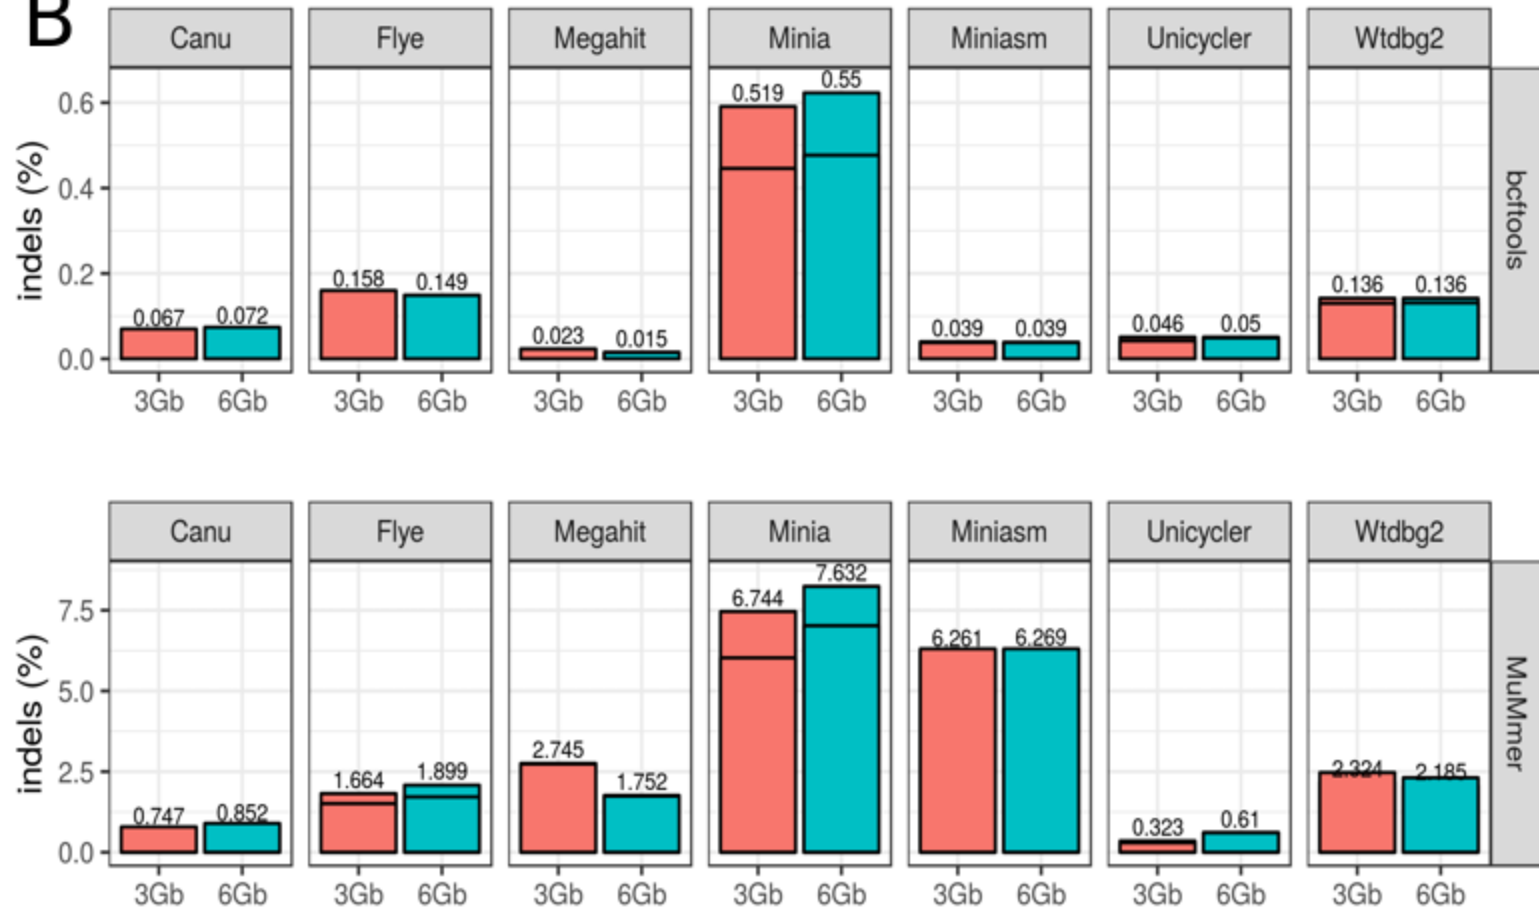

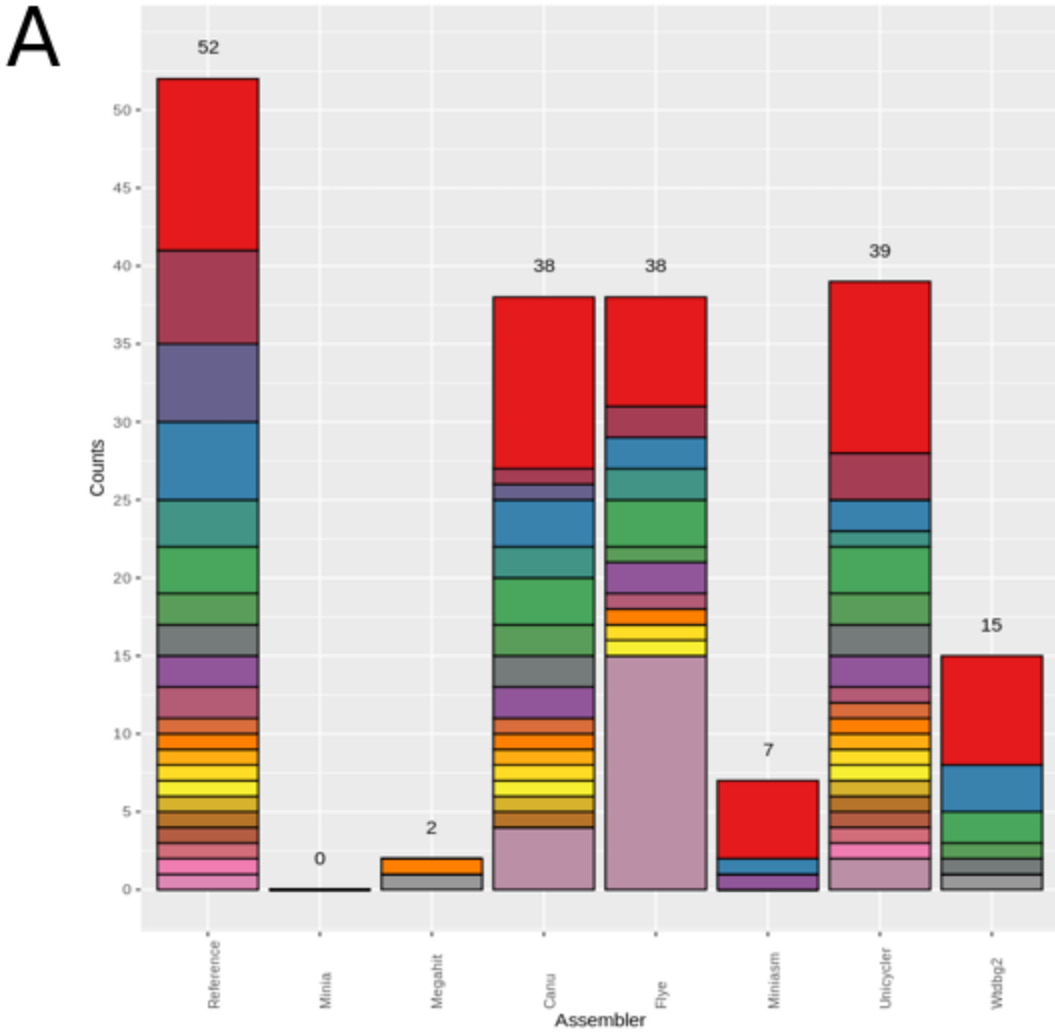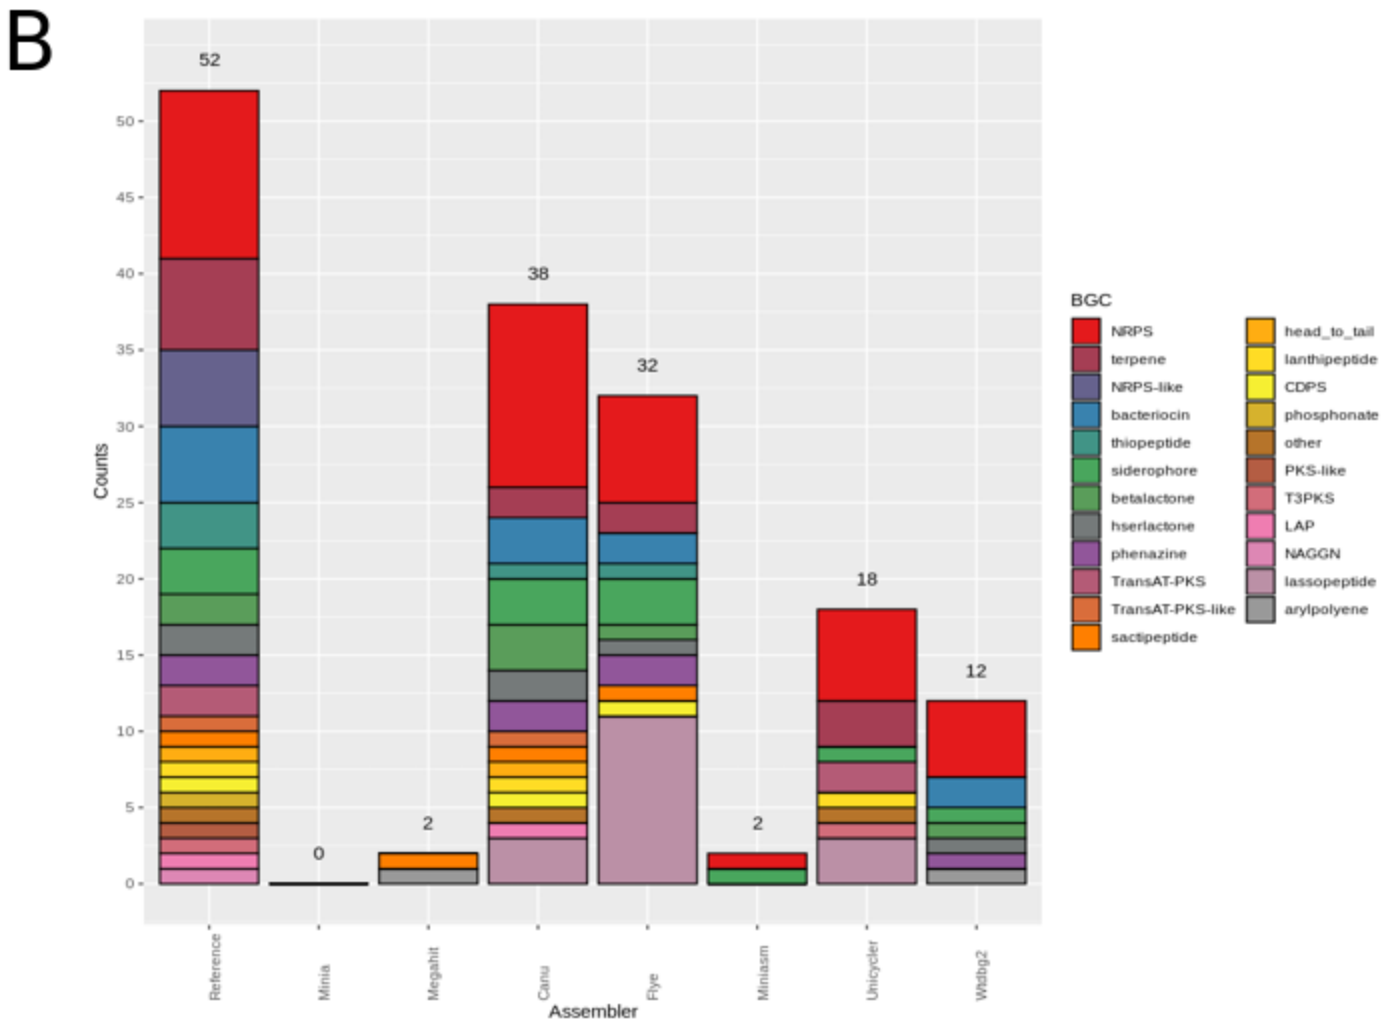

| <b>Species</b>                  | <b>Type</b> | <b>Estimated size NCBI (Mbp)</b> | <b>Theoretical Composition Even (CS)</b> | <b>Theoretical Composition Log (CSII)</b> |
|---------------------------------|-------------|----------------------------------|------------------------------------------|-------------------------------------------|
| <b>Bacillus subtilis</b>        | Gram +      | 4,134                            | 12,00 %                                  | 0,89 %                                    |
| <b>Cryptococcus neoformans</b>  | Yeast       | 18,599                           | 2,00 %                                   | 0,00089 %                                 |
| <b>Enterococcus faecalis</b>    | Gram +      | 2,965                            | 12,00 %                                  | 0,00089 %                                 |
| <b>Escherichia coli</b>         | Gram -      | 5,140                            | 12,00 %                                  | 0,089 %                                   |
| <b>Lactobacillus fermentum</b>  | Gram +      | 2,012                            | 12,00 %                                  | 0,0089 %                                  |
| <b>Listeria monocytogenes</b>   | Gram +      | 3,008                            | 12,00 %                                  | 89,1 %                                    |
| <b>Pseudomonas aeruginosa</b>   | Gram -      | 6,592                            | 12,00 %                                  | 8,9 %                                     |
| <b>Saccharomyces cerevisiae</b> | Yeast       | 11,864                           | 2,00 %                                   | 0,89 %                                    |
| <b>Salmonella enterica</b>      | Gram -      | 4,781                            | 12,00 %                                  | 0,089 %                                   |
| <b>Staphylococcus aureus</b>    | Gram +      | 2,838                            | 12,00 %                                  | 0,000089 %                                |

| <b>Assembler</b>  | <b>Version</b>                  | <b>Type</b>                              | <b>Incidence profile</b>                                                                                               |
|-------------------|---------------------------------|------------------------------------------|------------------------------------------------------------------------------------------------------------------------|
| <b>MetaSPAdes</b> | SPAdes v3.13.0                  | Short-reads assembler                    | RAM memory error                                                                                                       |
| <b>Megahit</b>    | MEGAHIT v1.1.4-2-gd1998a1       | Short-reads assembler                    | No incidence reported                                                                                                  |
| <b>Minia</b>      | Minia 2.0.7                     | Short-reads assembler                    | No incidence reported                                                                                                  |
| <b>Meraga</b>     | ---                             | Short-reads assembler                    | Several errors occurred when running the pipeline. Lack of an understandable manual for working with metagenomic data  |
| <b>Velour</b>     | Velour-0.1                      | Short-reads assembler                    | Several errors occurred when running the pipeline. Lack of an understandable manual for working with metagenomic data. |
| <b>Velvet</b>     | Velvet 1.2.10                   | Short-reads assembler                    | Several errors occurred when running the pipeline. No understandable error messages.                                   |
| <b>Canu</b>       | Canu snapshot v1.8 +106 changes | Long-reads assembler                     | No incidence reported                                                                                                  |
| <b>Flye</b>       | Flye 2.4-ga60a338               | Long-reads assembler                     | No incidence reported                                                                                                  |
| <b>HINGE</b>      | ---                             | Long-reads assembler                     | Lack of an understandable manual for modifying the config files necessary to run the software                          |
| <b>Miniasm</b>    | Miniasm 0.3(r179)               | Long-reads assembler                     | Failed to run with the 6 Gbps Log datasets                                                                             |
| <b>Unicycler</b>  | Unicycler v0.4.8-beta           | Short-, long- and hybrid reads assembler | Failed to run with the 3 Gbps Log datasets                                                                             |
| <b>Wtdbg2</b>     | wtdbg2 2.5                      | Long-reads assembler                     | No incidence reported                                                                                                  |

|                        | ORIGINAL DATASET |         |                 |                  |                   | NEW DATASET |       |                 |                  |                   |
|------------------------|------------------|---------|-----------------|------------------|-------------------|-------------|-------|-----------------|------------------|-------------------|
|                        | Gb               | Gbps    | Number of reads | Mean read length | Mean read quality | Gb          | Gbps  | Number of reads | Mean read length | Mean read quality |
| <b>Even GridION</b>    | 14               | 14.007  | 3,491,078.0     | 4,012.3          | 8.4               | 3           | 3.042 | 747,682.0       | 4,069.5          | 8.9               |
| <b>Log GridION</b>     | 16               | 16.032  | 3,667,007.0     | 4,372.0          | 8.0               | 3           | 3.053 | 685,926.0       | 4,451.0          | 8.7               |
| <b>Even PromethION</b> | 146              | 146.291 | 36,527,376.0    | 4,005.0          | 7.3               | 3           | 2.979 | 748,367.0       | 3,981.0          | 8.2               |
| <b>Log PromethION</b>  | 148              | 148.028 | 35,118,078.0    | 4,215.2          | 7.6               | 3           | 2.990 | 711,524.0       | 4,203.3          | 8.3               |
| <b>Even GridION</b>    | 14               | 14.007  | 3,491,078.0     | 4,012.3          | 8.4               | 6           | 6.092 | 1,495,377.0     | 4,073.9          | 8.8               |
| <b>Log GridION</b>     | 16               | 16.032  | 3,667,007.0     | 4,372.0          | 8.0               | 6           | 6.094 | 1,371,820.0     | 4,442.4          | 8.5               |
| <b>Even PromethION</b> | 146              | 146.291 | 36,527,376.0    | 4,005.0          | 7.3               | 6           | 5.970 | 1,496,919.0     | 3,988.8          | 8.2               |
| <b>Log PromethION</b>  | 148              | 148.028 | 35,118,078.0    | 4,215.2          | 7.6               | 6           | 5.956 | 1,422,918.0     | 4,185.8          | 8.2               |
